# Supplementary material
Source: publisher site journal article supplement (http://www.kjim.org/upload/media/kjim-2020-390-suppl2.pdf)
Supplement: Supplementary file 1 [file kjim-2020-390-suppl2.pdf]

**Supplementary Table 2. Baseline characteristics of SARS-CoV-2 (+) population matched for each class of antihypertensive medication**

| Characteristic | Control (n = 535) | RAS blocker (n = 535) | p value | Control (n = 652) | CCB (n = 652) | p value | Control (n = 254) | BB (n = 254) | p value | Control (n = 286) | Diuretics (n = 286) | p value |
|----------------|-------------------|-----------------------|---------|-------------------|---------------|---------|-------------------|--------------|---------|-------------------|---------------------|---------|
| Age, yr        | 68.2 ± 13.9       | 68.3 ± 12.4           | 0.871   | 66.0 ± 13.3       | 66.3 ± 13.5   | 0.704   | 67.6 ± 13.5       | 67.2 ± 13.9  | 0.731   | 66.4 ± 12.6       | 66.5 ± 12.6         | 0.950   |
| Male sex       | 235 (43.9)        | 239 (44.7)            | 0.806   | 281 (43.1)        | 267 (41.0)    | 0.432   | 108 (42.5)        | 120 (47.2)   | 0.284   | 104 (36.4)        | 103 (36.0)          | 0.931   |
| Heart failure  | 52 (9.7)          | 51 (9.5)              | 0.917   | 46 (7.1)          | 46 (7.1)      | 1.00    | 43 (16.9)         | 38 (15.0)    | 0.545   | 13 (4.6)          | 21 (7.3)            | 0.157   |
| Prior MI       | 22 (4.1)          | 24 (4.5)              | 0.763   | 25 (3.8)          | 21 (3.2)      | 0.548   | 12 (4.7)          | 17 (6.7)     | 0.339   | 8 (2.8)           | 9 (3.2)             | 0.806   |
| Diabetes       | 201 (37.6)        | 210 (39.2)            | 0.572   | 261 (40.0)        | 239 (36.7)    | 0.210   | 109 (42.9)        | 106 (41.7)   | 0.788   | 125 (43.7)        | 126 (44.1)          | 0.933   |
| COPD or asthma | 56 (10.5)         | 53 (9.9)              | 0.762   | 62 (9.5)          | 50 (7.7)      | 0.236   | 34 (13.4)         | 31 (12.2)    | 0.690   | 25 (8.7)          | 30 (10.5)           | 0.478   |
| RAS blocker    | -                 | -                     | -       | 413 (63.3)        | 411 (63.0)    | 0.909   | 155 (61.0)        | 156 (61.4)   | 0.927   | 248 (86.7)        | 249 (87.1)          | 0.901   |
| CCB            | 285 (53.3)        | 280 (52.3)            | 0.760   | -                 | -             | -       | 120 (47.2)        | 133 (52.4)   | 0.249   | 162 (50.5)        | 124 (49.4)          | 0.800   |
| Beta-blocker   | 110 (20.6)        | 117 (21.9)            | 0.601   | 121 (18.6)        | 110 (16.9)    | 0.425   | -                 | -            | -       | 53 (18.5)         | 54 (18.9)           | 0.915   |
| Diuretics      | 37 (6.9)          | 39 (7.3)              | 0.812   | 109 (16.7)        | 118 (18.1)    | 0.511   | 45 (17.7)         | 47 (18.5)    | 0.818   | -                 | -                   | -       |

Values are presented as mean ± SD or number (%).

SARS-CoV-2, severe acute respiratory syndrome coronavirus 2; RAS, renin-angiotensin system; CCB, calcium-channel blocker; BB, beta-blocker; MI, myocardial infarction; COPD, chronic obstructive pulmonary disease.
